# Supplementary material for: Review of Grave Injustice: The American Indian Repatriation Movement and NAGPRA By Kathleen S. Fine-Dare
Source: eLife journal article supplement (doi:10.7554/elife.70575), 2004-01-01
Supplement: supp1 [file elife-70575-supp1-v1.pdf]

## Antibody sequences

Signal sequence / VH/VL / CH/CL / linker / ybbR-tag / affinity tag

CR9501 HC:

MGWSCIIILFLVATATGVHSEVQLVQSGPGLVKPSQTLALTCTVSGASINSDNYWTWIRQRPGGGLEWIGHISYTGNTYYTPSLKSRLSMSLETSQSQF  
SLRLTSVTAADSAVYFCAACGAYVLISNCGWFDSWGQGTQVTVSSASTKGPSVFPLAPSSKSTSGGTAALGCLVKDYFPEPVTVSWNSGALTSVHTFPAV  
AVLQSSGLYSLSSVTVPSSSLGTQTYICNVNHKPSNTKVDKRVKPKSCDKTHTCPPCPAPELLGGPSVFLFPPKPKDTLMI SRTPEVTCVVDVSHED  
PEVKFNWYVDGVEVHNAKTKPREEQYNSTYRVVSVLTVLHQDWLNGKEYKCKVSNKALPAPIEKTISKAKGQPREPQVYTLPPSRDELTKNQVSLTCLV  
KGFYPSDIAVEWESNGQPENNYKTTTPVLDSDGSEFFLYSKLTVDKSRWQQGNVFCFSVMHEALHNHYTQKLSLSLSPGKGGSGGSDSLEFIASKLA\*

CR9501 LC:

MGWSCIIILFLVATATGVHSEIVMTQSPSSLSASIGDRVTITCQASQDITYLNWYQQKPGQAPRLLIYGASNLETGVP SRFTGSGYGTDFSVTISLQF  
EDIATYYCQQYQYLPYTFAPGKTKVEIKRTVAAPSVEIFPPSDEQLKSGTASVVCLLNNFYPREAKVQWKVDNALQSGNSQESVTEQDSKDYSLSSLT  
TLTKADYEKHKVYACEVTHQGLSSPVTKSFNRGEC

5C4 HC:

MGWSCIIILFLVATATGVHSEVQLQSGAELVKPGASVKLSCTASGFNIKDTFFHWVKQRPEQGLEWIGRIDPADGHTKYDPKFGKATITADTSSNTAFL  
QLSSLTSVDTAVYYCATTITAVVPTPYNAMDYWGQGTQVTVSSASTKGPSVFPLAPSSKSTSGGTAALGCLVKDYFPEPVTVSWNSGALTSVHTFPAV  
LQSSGLYSLSSVTVPSSSLGTQTYICNVNHKPSNTKVDKRVKPKSCDKTHTCPPCPAPELLGGPSVFLFPPKPKDTLMI SRTPEVTCVVDVSHEDPE  
VKFNWYVDGVEVHNAKTKPREEQYNSTYRVVSVLTVLHQDWLNGKEYKCKVSNKALPAPIEKTISKAKGQPREPQVYTLPPSRDELTKNQVSLTCLVKG  
FYPSDIAVEWESNGQPENNYKTTTPVLDSDGSEFFLYSKLTVDKSRWQQGNVFCFSVMHEALHNHYTQKLSLSLSPGKGGSGGSDSLEFIASKLA\*

5C4 LC:

MGWSCIIILFLVATATGVHSDIVLTVQSPASLAVSLGQRTTISCRASESVDSFDNSFIHWYQQKPGQPPKLLIFLASSLESVGP PARFSGSGSRTDFTLTID  
PVEADAATYYCQQSNEDPFTFGSGTKLEIKRADAPSVEIFPPSDEQLKSGTASVVCLLNNFYPREAKVQWKVDNALQSGNSQESVTEQDSKDYSLSSLT  
SSTLTLTKADYEKHKVYACEVTHQGLSSPVTKSFNRGEC\*

Motavizumab HC:

MGWSCIIILFLVATATGVHSEVQLVQSGPGLVKPSQTLALTCTVSGASINSDNYWTWIRQRPGGGLEWIGHISYTGNTYYTPSLKSRLSMSLETSQSQF  
VLKVTNMDPADTATYYCARDMIFNFYFDVWGQGTQVTVSSASTKGPSVFPLAPSSKSTSGGTAALGCLVKDYFPEPVTVSWNSGALTSVHTFPAV  
SGLYSLSSVTVPSSSLGTQTYICNVNHKPSNTKVDKRVKPKSCDKTHTCPPCPAPELLGGPSVFLFPPKPKDTLMI SRTPEVTCVVDVSHEDPEVKF  
NRYVDGVEVHNAKTKPREEQYNSTYRVVSVLTVLHQDWLNGKEYKCKVSNKALPAPIEKTISKAKGQPREPQVYTLPPSRDELTKNQVSLTCLVKG  
SDIAVEWESNGQPENNYKTTTPVLDSDGSEFFLYSKLTVDKSRWQQGNVFCFSVMHEALHNHYTQKLSLSLSPGKGGSGGSDSLEFIASKLA\*

Motavizumab LC:

MGWSCIIILFLVATATGVHSDIQMTQSPSTLSASVGDVTVITCSASSRVGYMHWYQQKPGKAPKLLIYDTSKLSAGVPSRFSGSGTEFTLTISLQPD  
DFATYYCFQGSQYPTFTFGGKTKVEIKRTVAAPSVEIFPPSDEQLKSGTASVVCLLNNFYPREAKVQWKVDNALQSGNSQESVTEQDSKDYSLSSLT  
LSKADYEKHKVYACEVTHQGLSSPVTKSFNRGEC\*

101F HC:

MGWSCIIILFLVATATGVHSEVQLVQSGPGLVKPSQTLALTCTVSGASINSDNYWTWIRQRPGGGLEWIGHISYTGNTYYTPSLKSRLSMSLETSQSQF  
FLKITSVDTADTATYYCARLYGFTYGFAYWGQGTQVTVSSASTKGPSVFPLAPSSKSTSGGTAALGCLVKDYFPEPVTVSWNSGALTSVHTFPAV  
SGLYSLSSVTVPSSSLGTQTYICNVNHKPSNTKVDKRVKPKSCDKTHTCPPCPAPELLGGPSVFLFPPKPKDTLMI SRTPEVTCVVDVSHEDPEVKF  
NRYVDGVEVHNAKTKPREEQYNSTYRVVSVLTVLHQDWLNGKEYKCKVSNKALPAPIEKTISKAKGQPREPQVYTLPPSRDELTKNQVSLTCLVKG  
SDIAVEWESNGQPENNYKTTTPVLDSDGSEFFLYSKLTVDKSRWQQGNVFCFSVMHEALHNHYTQKLSLSLSPGKGGSGGSDSLEFIASKLA\*

101F LC:

MGWSCIIILFLVATATGVHSDIVLTVQSPASLAVSLGQRATIFCRASQSVQDNGISYMHWFQQKPGQPPKLLIYAASNPESGIPARFTGSGSGTDFTLNIH  
PVEEEDAATYYCQQIIEDPWTFGGKTKLEIKRADAPSVEIFPPSDEQLKSGTASVVCLLNNFYPREAKVQWKVDNALQSGNSQESVTEQDSKDYSLSSLT  
SSTLTLTKADYEKHKVYACEVTHQGLSSPVTKSFNRGEC\*

ADI-19425 HC:

MGWSCIIILFLVATATGVHSEVQLVQSGPGLVKPSQTLALTCTVSGASINSDNYWTWIRQRPGGGLEWIGHISYTGNTYYTPSLKSRLSMSLETSQSQF  
LQMNLSRAEDTAVYYCARLGYCSGGSCHFDYWGQGTQVTVSSASTKGPSVFPLAPSSKSTSGGTAALGCLVKDYFPEPVTVSWNSGALTSVHTFPAV  
QSSGLYSLSSVTVPSSSLGTQTYICNVNHKPSNTKVDKRVKPKSCDKTHTCPPCPAPELLGGPSVFLFPPKPKDTLMI SRTPEVTCVVDVSHEDPEV  
KFNWYVDGVEVHNAKTKPREEQYNSTYRVVSVLTVLHQDWLNGKEYKCKVSNKALPAPIEKTISKAKGQPREPQVYTLPPSRDELTKNQVSLTCLVKG  
YPSDIAVEWESNGQPENNYKTTTPVLDSDGSEFFLYSKLTVDKSRWQQGNVFCFSVMHEALHNHYTQKLSLSLSPGKGGSGGSDSLEFIASKLA\*

ADI-19425 LC:

MGWSCIIILFLVATATGVHSEVQLVQSGPGLVKPSQTLALTCTVSGASINSDNYWTWIRQRPGGGLEWIGHISYTGNTYYTPSLKSRLSMSLETSQSQF  
QAEDEADYYCQSYDSSLSGFYVFGTGKTLTVLGQPKAAPSVEIFPPSDEQLKSGTASVVCLLNNFYPREAKVQWKVDNALQSGNSQESVTEQDSKDYSLSSLT  
SSTLTLTKADYEKHKVYACEVTHQGLSSPVTKSFNRGEC\*

ADI-14353 HC:

MGWSCIIILFLVATATGVHSEVQLVQSGAELVKPGASVKLSCTASGFNIKDTFFHWVKQRPEQGLEWIGRIDPADGHTKYDPKFGKATITADTSSNTAFL  
MELSSLTSED TAVYYCARGGYDYYGMDVWGQGTQVTVSSASTKGPSVFPLAPSSKSTSGGTAALGCLVKDYFPEPVTVSWNSGALTSVHTFPAV  
LQSSGLYSLSSVTVPSSSLGTQTYICNVNHKPSNTKVDKRVKPKSCDKTHTCPPCPAPELLGGPSVFLFPPKPKDTLMI SRTPEVTCVVDVSHEDPEVKFN

WYVDGVEVHNAKTKPREEQYNSTYRVVSVLTVLHQDWLNGKEYKCKVSNKALPAPIEKTISKAKGQPREPQVYTLPPSRDELTKNQVSLTCLVKGFYPS  
DIAVEWESNGQPENNYKTTPPVLDSDGSFFLYSKLTVDKSRWQQGNVFCSCVMHEALHNHYTQKLSLSLSPGKGGSGGSDSLEFTASKLA\*

ADI-14353 LC:

MGWSCIIIFLVATATGVHSSQALTQPASVSGSPGQSITISCTGTSSDVGNYVSWHQHHPGKAPKLLIYDVSNRPSGVSNRFSGSKSGNTASLSISGL  
QAEDEADYYCSSFTSTSTPYVFGTGTQLTVLGGPKAAPSVFI FPPSDEQLKSGTASVVCLLNNFYPREAKVQWKVDNALQSGNSQESVTEQDSKSTYS  
LSSTLTLSKADYEKHKVYACEVTHQGLSSPVTKSFNRGEC\*

ADI-14359 HC:

MGWSCIIIFLVATATGVHSSQVTLRESGPALVKPTQTLTLTCTFSGFSLSTSGMCSVSWIRQPPGKALEWLARIDWDDDKYYSTSLKTRLTISKDTSKNQV  
VLTMTNMDPVDATATYCARATNYDSGYYSLYFDYWGQGLTVTVSSASTKGPSVFPLAPSSKSTSGGTAALGCLVKDYFPEPVTVSWNSGALTSVHTF  
PAVLQSSGLYSLSSVTVTPSSSLGTQTYICNVNHKPSNTKVDKRVPEPKSCDKHTHTCPPCPAPELLGGPSVFLFPPKPKDTLMISRTPEVTCVVDVSHEDP  
DPEVKFNWYVDGVEVHNAKTKPREEQYNSTYRVVSVLTVLHQDWLNGKEYKCKVSNKALPAPIEKTISKAKGQPREPQVYTLPPSRDELTKNQVSLTCLV  
KGFYPSDIAVEWESNGQPENNYKTTPPVLDSDGSFFLYSKLTVDKSRWQQGNVFCSCVMHEALHNHYTQKLSLSLSPGKGGSGGSDSLEFTASKLA\*

ADI-14359 LC:

MGWSCIIIFLVATATGVHSDIQMTQSPSSLSASVGDRTVITCRASQSISSYLNWYQQKPGKAPKLLIYAASSLQSGVPSRFSGSGSGTDFTLTISLQ  
EDFATYYCQQSYSTPYTFGGGTKEIKRTVAAPSVFI FPPSDEQLKSGTASVVCLLNNFYPREAKVQWKVDNALQSGNSQESVTEQDSKSTYSLSSTL  
TLSKADYEKHKVYACEVTHQGLSSPVTKSFNRGEC\*

3D3 HC:

MGWSCIIIFLVATATGVHSEEQLVESGGGLVQPGRSLRLSCVGSGLRFEHAMHWVRQAPGRGLEWVSGISWNSSVGYADSVKGRFTTSRDNAKDLIF  
LEMNLTLRSEDTALYFCAIMVATTKNDFHYKDVWGKGTTVTVSSASTKGPSVFPLAPSSKSTSGGTAALGCLVKDYFPEPVTVSWNSGALTSVHTFPA  
VLQSSGLYSLSSVTVTPSSSLGTQTYICNVNHKPSNTKVDKRVPEPKSCDKHTHTCPPCPAPELLGGPSVFLFPPKPKDTLMISRTPEVTCVVDVSHEDP  
EVKFNWYVDGVEVHNAKTKPREEQYNSTYRVVSVLTVLHQDWLNGKEYKCKVSNKALPAPIEKTISKAKGQPREPQVYTLPPSRDELTKNQVSLTCLV  
KGFYPSDIAVEWESNGQPENNYKTTPPVLDSDGSFFLYSKLTVDKSRWQQGNVFCSCVMHEALHNHYTQKLSLSLSPGKGGSGGSDSLEFTASKLA\*

3D3 LC:

MGWSCIIIFLVATATGVHSSQIVLTQSPATLSLSPGERATLSCRASQSVSNHLAWYQQKPGQAPRLLIYETSNRATGIPPRFSGSGSGTDFTLTISLQ  
EDFAVYYCQQRNNWYTFGGGTKEIKRTVAAPSVFI FPPSDEQLKSGTASVVCLLNNFYPREAKVQWKVDNALQSGNSQESVTEQDSKSTYSLSSTL  
LSKADYEKHKVYACEVTHQGLSSPVTKSFNRGEC\*

5C4 IgM HC:

MGWSCIIIFLVATATGVHSSVQLQQSGAELVKPGASVKLSCTASGFNIKDTFFHWWKQRPEQGLEWIGRIDPADGHTKYDPKFQKATITADTSSNTAFL  
QLSSLTSDVAVYYCATTITAVVTPYNYAMDYWGQGTTVTVSSASASAPTLFPLVSCENSPSDTSSVAVGCLAQDFLPDSITFSWKYKNNSDISSTRGF  
PSVLRGGKYAATSQVLLPSKDVMTGDEHVVCKVQHPNGNKEKNVPLPVIAELPKVSVFVPPRDGFFGNPRKSKLICQATGFSRPIQVSWLREGKQV  
GSGVTDDQVQAEAKESGPTTYKVTSTLTIKESDWLQSMFTCRVDHRGLTFQQNASSMCPDQDPAIRVFAIPPSFASIFLTKSTKLTCLVTDLTTYS  
VTISWTRQNGEAVKTHHTNISSEHPNATFSAVGEASICEDDWNSGERFTCTVTHDLPSPKQTI SRPKGVALHRPDVYLLPPAREQLNLRRESATITCLV  
TGFSPADVFNQWQMRGQPLSPEKYVTSAPMPEPQAPGRYFAHSILTVSEEWNTGETYTCVVAHEALPNRVTERTVDKSTGKPTLYNVSLVMSDTAGT  
YGGSHHHHHGGSDSLEFTASKLA\*

J Chain:

MGWSCIIIFLVATATGVHSSQEDERIVLVDNKCKCARITSRIRRSSEDPNEDIVERNIRIIVPLNNRENISDPTSPLRTRFVYHLSDLCKKCDPTEVELD  
NQIVTATQSNICDEDSATETCYTYDRNKCYTAVVPLVYGGETKMVETALTPDACYPDGGSSGNSWHPQFEKGGGNSWHPQFEK\*

ADI-14359 Fab HC:

MGWSCIIIFLVATATGVHSSQVTLRESGPALVKPTQTLTLTCTFSGFSLSTSGMCSVSWIRQPPGKALEWLARIDWDDDKYYSTSLKTRLTISKDTSKNQV  
VLTMTNMDPVDATATYCARATNYDSGYYSLYFDYWGQGLTVTVSSASTKGPSVFPLAPSSKSTSGGTAALGCLVKDYFPEPVTVSWNSGALTSVHTF  
PAVLQSSGLYSLSSVTVTPSSSLGTQTYICNVNHKPSNTKVDKRVPEPKSCDKGGSHHHHHGGSDSLEFTASKLA\*

D25 Fab HC:

MGWSCIIIFLVATATGVHSSQVQLVQSGAEVKKPGSSVMVSCQASGGPLRNYIINWLRQAPGQGPPEWMGGIIPVLGTVHYAPKFQGRVTITADESTDTAY  
IHLISLRSEDTAMYYCATETALVSTTYLPHYFDNWGQGLTVTVSSASTKGPSVFPLAPSSKSTSGGTAALGCLVKDYFPEPVTVSWNSGALTSVHTF  
PAVLQSSGLYSLSSVTVTPSSSLGTQTYICNVNHKPSNTKVDKRVPEPKSCDKGGSHHHHHGGSDSLEFTASKLA\*

D25 LC:

MGWSCIIIFLVATATGVHSDIQMTQSPSSLSAAVGDRTVITCQASQDIVNYLNWYQQKPGKAPKLLIYVASNLETGVPSRFSGSGSGTDFSLTISLQ  
EDVATYYCQQYDNLPLTFGGGTKEIKRTVAAPSVFI FPPSDEQLKSGTASVVCLLNNFYPREAKVQWKVDNALQSGNSQESVTEQDSKSTYSLSSTL  
TLSKADYEKHKVYACEVTHQGLSSPVTKSFNRGEC\*
